# Supplementary material for: Complex interaction recognition via advanced multilevel feature fusion and deep learning model
Source: PeerJ journal article supplement (doi:10.7717/peerj-cs.3514), 2026-02-16
Supplement: Computing_infrastructure.docx [file Computing_infrastructure.docx]

**Computing infrastructure**

The experiments were conducted on a Laptop equipped with Windows 11 operating system, AMD Ryzen 7000 series with Radeon Graphics 2.00 GHz. The system’s performance was evaluated using two benchmark datasets: UoL and shakefive2 dataset.
