# Supplementary material for: Complex interaction recognition via advanced multilevel feature fusion and deep learning model
Source: PeerJ journal article supplement (doi:10.7717/peerj-cs.3514), 2026-02-16
Supplement: Discussion_JS_EO.docx [file Discussion_JS_EO.docx]

**DISCUSSION**

In this work, we propose a novel hybrid feature extraction pipeline that combines the strengths of both local and global feature descriptors (FAST and LIOP). The unique combination allows for the capture of fine-grained details and contextual information, resulting in better performance. To the best of our knowledge, this is the first attempt to apply fuzzy optimization to combining FAST and LIOP features for human activity recognition. This approach provides more robust and accurate feature representation. The optimized feature extraction pipeline and our proposed deep neural network architecture significantly improve the overall system efficiency. We have significantly improved the efficiency of our human activity recognition system by applying the power of deep neural network.

The BIT Interaction Dataset contains scenes with rapidly changing backgrounds, including outdoor environments, changing lighting conditions, and moving objects. Traditional activity recognition systems often fail to distinguish between human activity and background noise in such settings. To overcome this, we developed a robust model to focus on human interactions in the presence of background noise. This is a big step forward from mostly static background-focused methods. The SBU Interaction Dataset presents another challenge: occlusions, where another occludes parts of one person’s body or object during interaction. However, most existing models fail when subjects are partially occluded. To this end, we developed a hybrid method of feature extraction techniques to achieve effective recognition even when key body parts are obscured. This is very good for big when complex datasets.

The datasets in both cases are complex human movements, such as subtle hand gestures, object exchanges, or body part coordination during interactions. Conventional methods cannot capture these fine-grained actions because they involve complex temporal and spatial relationships between body parts. This flexibility allows this model to localize more complex and detailed behaviors better than the traditional models. Working with these diverse datasets demonstrates our approach's ability to handle complexities like dynamic backgrounds, occlusion, and complex movements in different environments. The novelty is how each challenge is addressed to create a more robust and adaptable recognition system. A key differentiator of our method is its ability to generalize across such diverse conditions, which shows its applicability to a broad range of scenarios.

The improved preprocessing stage is one of the key aspects of my method, which utilizes HSV color space conversion, channel splitting, and Gaussian filtering to enhance input data quality for recognition tasks. I also extract silhouettes using statistical methods, capturing movement dynamics and contours well. My method uses FAST and LIOP for feature extraction, concentrating on the unique features necessary to distinguish between different activities. My fuzzy optimization model incorporates better uncertainties and variabilities in human behavior than traditional LSTM methods. Finally, my approach integrates a Deep Neural Network (DNN) optimized via these advanced features to generalize more effectively across various activity categories. My proposed method generally achieves superior accuracy compared to standard LSTM-based approaches due to the combination of sophisticated preprocessing, improved feature extraction, and powerful optimization strategies.

Another advanced step is the fuzzy optimization application, which automates the hyperparameter fine tuning, including learning rate, batch size, and architecture depth. On the other hand, shortcuts arbitrarily high accuracy mitigation and exploration on a medium development dataset. This adaptive method significantly reduces computational overhead and guarantees optimal network performance. A major difference from conventional grid search or random search methods is that fuzzy optimization is more flexible and decreases the search space, making it a more efficient process as much faster and yet more accurate. The proposed framework was validated rigorously on the BIT interaction dataset, achieving 94% accuracy. We compared our approach with existing state-of-the-art methods and showed that our approach consistently outperforms traditional pipelines, especially in handling complex human interactions and various environmental conditions.

we conducted experiments to test LIOP patch size and fuzzy optimization thresholds. Results shown in Table a (1).

| **Table a. (1) Sensitivity of Performance to LIOP Patch Size and (2)**  **Fuzzy Optimization Thresholds.** | | | |
| --- | --- | --- | --- |
| 1. **Patch Size (Pixels)** | **Texture Representation (LIOP Score)** | **Recognition Accuracy (BIT Dataset)** | **Recognition Accuracy (SBU Dataset)** |
| 8x8 | 0.78 | 93.00% | 86.00% |
| 16x16 | 0.85 | 94.00% | 87.00% |
| 32x32 | 0.92 | 91.00% | 85.50% |
| 1. **Threshold Value** | **Feature Selection (No. of Features)** | **Recognition Accuracy (BIT Dataset)** | **Recognition Accuracy (SBU Dataset)** |
| 0.1 | 250 | 92.00% | 85.00% |
| 0.3 | 300 | 93.50% | 86.50% |
| 0.5 | 350 | 94.00% | 87.00% |

Patch size increases texture representation, as indicated by the LIOP score, at the expense of localization accuracy. The best patch size to identify actions and maintain fine details is 16x16. The fuzzy optimization threshold value 0.3 gave the optimal trade-off between feature selection and performance, resulting in the best recognition accuracy as shown in Table a (2). Obtains 94 % accuracy on BIT-Interaction and 88.25 % on SBU-Interaction categories, which shows that it is robust in retrieving complex human actions. The hybrid combination of FAST and LIOP facilitates the punishment of precise detail, and lends general recognition to minute interactions. Frames of the system can be processed within 32.5 ms (BIT) and 34.0 ms (SBU), thus the system is ideal to run real-time applications such as surveillance. Works on a large variety of data sets generally well, with good results on the NTU RGB+D dataset (85.40%). The system has a high tolerance to occlusion (occlusion of up to 50%) and synthetic noise with a slight decrease in accuracy.

Methods such as fuzzy optimization or Gaussian filtering introduce some processing delay, which is a factor of time complexity. The performance is dependent on the quality of features that are extracted, and inferior feature extraction could ruin the performance. Low-Light & Fast Motion: In low-light or fast-motion scene, performance degrades because of the weakness in feature extraction. Deep learning models necessitate a lot of computational costs during training, but this cannot always be the case. The system is not able to handle the large occlusions and thus improvement in such a scenario is needed.

| **Table b. Computational Latency** | |
| --- | --- |
| **Dataset** | **Average Latency per Frame** (ms) |
| BIT Interaction | 32.5 ms |
| SBU Interaction | 34.0 ms |
| NTU RGB+D | 45.2 ms |

We measured the computational latency of the proposed system to assess its processing efficiency for human activity recognition on different datasets. The mean processing time per frame of human activity recognition was measured on different datasets:

The results in Table b show that the system processes frames quickly enough to be applicable for real-time surveillance and monitoring tasks.
