# Supplementary material for: Complex interaction recognition via advanced multilevel feature fusion and deep learning model
Source: PeerJ journal article supplement (doi:10.7717/peerj-cs.3514), 2026-02-16
Supplement: Readme.docx [file Readme.docx]

**Complex Interaction Recognition via Advanced Multilevel Feature Fusion and Deep Learning Model**

Our proposed DNN-based framework unites several preprocessing and feature extraction methods to accomplish this goal. The system starts with HSV color processing to improve image visibility and then uses Gaussian filtering for noise reduction. The statistical method performs silhouette extraction, and the feature extraction process utilizes LIOP and FAST algorithms together. Feature discrimination receives enhancement through the application of fuzzy optimization techniques. The optimized features proceed to a DNN for processing which classifies human activities. The proposed framework demonstrates high effectiveness through its recognition performance which reached 94% on BIT interaction data and 88.25% on SBU interaction data. This work presents an advanced human activity recognition system that shows promise for real-world applications such as surveillance systems, video analytics, and interactive technologies, enabling more precise human behavior analysis.

**Table of Contents**

1. Setup of project
2. Preparation of data
3. Explanation of code
4. Implementation setup

**Project Setup**

**Prerequisites**

- **Python 3.6**
- **Libraries:** Install the required libraries by running:

import cv2

import os

import numpy as np

from skimage.feature import local_binary_patterns

from sklearn.discriminant_analysis import QuadraticDiscriminantAnalysis

from tensorflow.keras.models import Sequential

from tensorflow.keras.layers import Conv1D, MaxPooling1D, Flatten, Dense

from tensorflow.keras.optimizers import Adam

from sklearn.metrics import f1_score, precision_score, recall_score, confusion_matrix

import matplotlib.pyplot as plt

import seaborn as sns

import mediapipe as mp

from google.colab.patches import cv2_imshow

**System Requirements**

The experiments were conducted on a Laptop equipped with Windows 11 operating system, AMD Ryzen 7000 series with Radeon Graphics 2.00 GHz

**Preparation of Data**

BIT Interaction and SBU dataset need to be downloaded freely available online and put in a folder called data (loc_src = 'data'). These images are taken directly and hence paths should match the requirements in the code. If required, then modify the loc_dst = 'output' function accordingly.

loc_src = 'data'

loc_dst = 'output'

**Explanation of Code**

The model consists of several key components, each implemented within the provided code:

Certainly, here's the code explanation with English headings and code snippets:

**1.** **Data Loading and Preprocessing** def load_and_preprocess_video(video_path) function reads the video from the given path. It converts the video frames to HSV color space for better color representation. It applies a Gaussian filter to reduce noise in each color channel (H, S, V).

**2. Silhouette Extraction (Statistical Method)**

def silhouette_extraction(frames):
 silhouettes = []
 for frame in frames:
 silhouette = cv2.threshold(frame, 127, 255, cv2.THRESH_BINARY)[1]
 silhouettes.append(silhouette)

 return silhouettes

**3. Feature Extraction: Oriented FAST and Local Intensity Order Pattern (LIOP)**

**Oriented FAST**

def extract_fast_features(frames):
 fast = cv2.FastFeatureDetector_create()
 keypoints = []

 for frame in frames:
 kp = fast.detect(frame, None)
 keypoints.append(kp)

 return keypoints

**Local Intensity Order Pattern (LIOP)**

def extract_liop_features(frames):
 liop_features = []

 for frame in frames:
 gray = cv2.cvtColor(frame, cv2.COLOR_BGR2GRAY)
 liop = local_intensity_order_pattern(gray)
 liop_features.append(liop)

 return liop_features

**4. Feature Optimization: Fuzzy Optimization**

def fuzzy_feature_optimization(features):
 optimized_features = fuzzy_clustering(features)
 return optimized_features

**5. Classification: Deep Neural Network (DNN)**

from keras.models import Sequential
from keras.layers import Dense

def create_dnn_classifier(input_shape):
 model = Sequential()
 model.add(Dense(128, input_dim=input_shape, activation='relu'))
 model.add(Dense(64, activation='relu'))
 model.add(Dense(32, activation='relu'))
 model.add(Dense(1, activation='sigmoid'))

 model.compile(loss='binary_crossentropy', optimizer='adam', metrics=['accuracy'])

 return model
