# Supplementary material for: Complex interaction recognition via advanced multilevel feature fusion and deep learning model
Source: PeerJ journal article supplement (doi:10.7717/peerj-cs.3514), 2026-02-16
Supplement: Table_S1_JS_EO.docx [file Table_S1_JS_EO.docx]

| **Table S1** **Existing recognition model and human interaction techniques related work** | | | |  |
| --- | --- | --- | --- | --- |
| **State-of-the-Art Models** | | **Main contributions** | **Limitations** | **Proposed Model Comparison** |
| Chaaraoui and his colleagues developed handcrafted features in their model (Chaaraoui, Climent-Pérez & Flórez-Revuelta, 2012) | | High interpretability, less computational cost. | Limited flexibility to complex interfaces | The proposed model employs FAST and LIOP features as its component features while avoiding the exclusive use of handcrafted features. |
| GCN (Shi et al., 2019) | Their network architecture uses two concurrent streams to merge spatio-temporal data for recognizing actions using human body skeletons. | | For peak performance, the system requires many examples from training data. | Using Hybrid features with DNN implicitly embeds spatial-temporal data while delivering equivalent performance output with less processing complexity.. |
| Transformer Interaction (Pang et al., 2022) | A Transformer computer model for human interaction identification that detects extensive temporal connections between multiple involved systems. | | The model faces difficulties when determining its best-performing parameters after selection. | Our model incorporates DNN and hybrid feature extraction techniques because these features could benefit from additional integration of attention mechanisms to improve interaction modelling. |
| Mixed Approaches (Yi, Lee & Hwang, 2023) | Use multiple methods | | Intensified complication and computational load | Our model combines LIOP features with image features known as FAST. |
| Multi-Modal Approaches (Wang et al., 2024) | use various sources of data | | Integration disputes and data arrangement | The model we developed improves data handling of multiple sources to enhance performance outputs. |
