# Supplementary material for: Complex interaction recognition via advanced multilevel feature fusion and deep learning model
Source: PeerJ journal article supplement (doi:10.7717/peerj-cs.3514), 2026-02-16
Supplement: Table_S2_JS_EO.docx [file Table_S2_JS_EO.docx]

| **Table S2. Comparison of Fuzzy Optimization with SE-Net and Autoencoders.** | | | | | |
| --- | --- | --- | --- | --- | --- |
| **Method** | **Feature Discrimination** | | **Interpretability** | **Computational Overhead** | |
| **Fuzzy Optimization** | Based on fuzzy rules that assign importance to each feature | | High: Human-readable rules for feature weighting | Moderate: Adds slight overhead but is manageable | |
| **SE-Net** | Uses learned weights for channel-wise attention | | Moderate: No explicit interpretability | High: Requires training on large datasets | |
| **Autoencoders** | Uses unsupervised learning for feature extraction | | Low: Difficult to interpret learned features | Low: Efficient in dimensionality reduction | |
|  | |  |  |  | |
