# Supplementary material for: Complex interaction recognition via advanced multilevel feature fusion and deep learning model
Source: PeerJ journal article supplement (doi:10.7717/peerj-cs.3514), 2026-02-16
Supplement: Table_S3_JS_EO.docx [file Table_S3_JS_EO.docx]

| **Table S3. Computational Overhead of Fuzzy Optimization.** | | | | |
| --- | --- | --- | --- | --- |
| **Component** | **Time Complexity (Without Fuzzy Optimization)** | **Time Complexity (With Fuzzy Optimization)** | **Training Time (Seconds)** | **Inference Time (ms/frame)** |
| **Preprocessing** | O(n) | O(n) | 4.5 | 32.5 |
| **Silhouette Extraction** | O(n log n) | O(n log n) | 3.0 | 34.0 |
| **Feature Extraction** | O(n) | O(n log n) | 2.8 | 33.0 |
| **Fuzzy Optimization** | N/A | O(n2) | 6.5 | 35.0 |
| **DNN Classification** | O(n log n) | O(n log n) | 10 | 40.0 |
