# Supplementary material for: Complex interaction recognition via advanced multilevel feature fusion and deep learning model
Source: PeerJ journal article supplement (doi:10.7717/peerj-cs.3514), 2026-02-16
Supplement: Table_S4_JS_EO.docx [file Table_S4_JS_EO.docx]

| **Table S4. Robustness to Occlusion and Noise** | | | | |
| --- | --- | --- | --- | --- |
| **Dataset** | **Condition** | **Accuracy (%)** | **F1-Score** | **Performance Drop (%)** |
| SBU Interaction | No Occlusion | 88.25% | 0.91 | - |
| SBU Interaction | 30% Occlusion | 84.10% | 0.88 | -4.15% |
| SBU Interaction | 50% Occlusion | 80.25% | 0.85 | -8.00% |
| SBU Interaction | No Noise | 88.25% | 0.91 | - |
| SBU Interaction | Synthetic Noise (10%) | 85.00% | 0.88 | -3.25% |
