# Supplementary material for: Complex interaction recognition via advanced multilevel feature fusion and deep learning model
Source: PeerJ journal article supplement (doi:10.7717/peerj-cs.3514), 2026-02-16
Supplement: Table_S5_JS_EO.docx [file Table_S5_JS_EO.docx]

| **Table S5. Cross-Dataset Validation** | | | |
| --- | --- | --- | --- |
| **Training Dataset** | **Testing Dataset** | **Accuracy (%)** | **F1-Score** |
| BIT Interaction | NTU RGB+D | 85.40% | 0.84 |
| BIT Interaction | BIT Interaction | 94.00% | 0.96 |
